# Supplementary figures and images for: Saccharomyces cerevisiae Gle2/Rae1 is involved in septin organization, essential for cell cycle progression
Source: PubMed Central journal article supplement — Yeast. 2017 Sep 28;34(11):459–70. doi: 10.1002/yea.3249 (PMC6472880; doi:10.1002/yea.3249), 2017-09-28

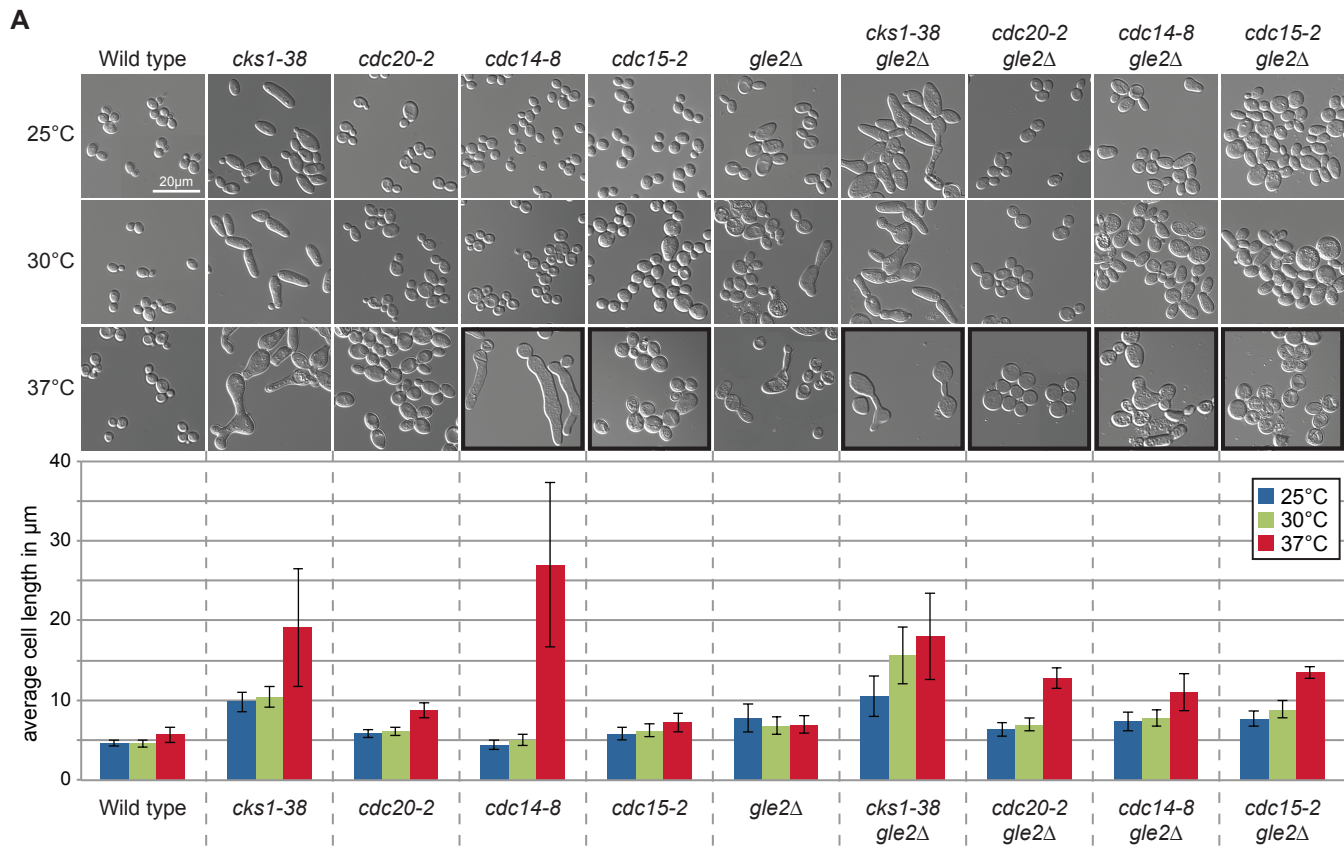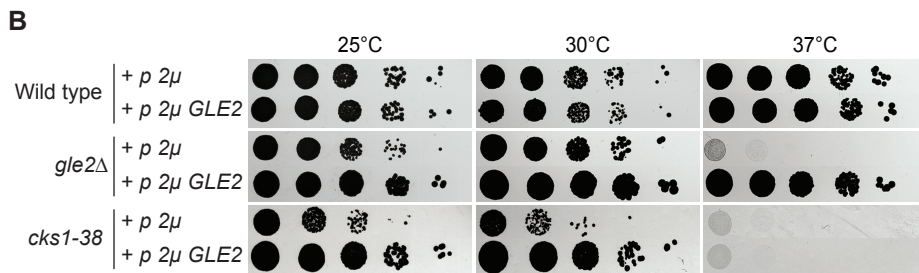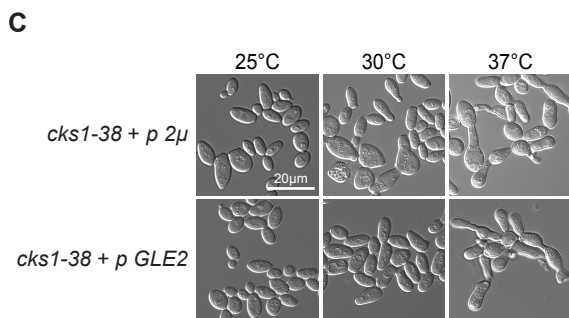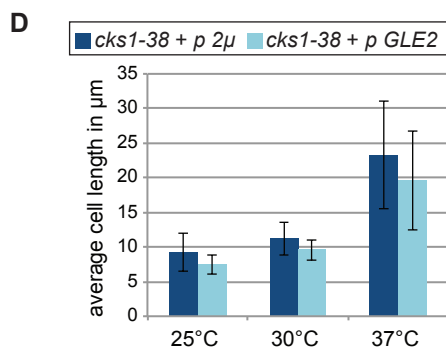

Supplement: YEA-34-459-s002.pdf [file YEA-34-459-s002.pdf]

A

37 °C, 1 h

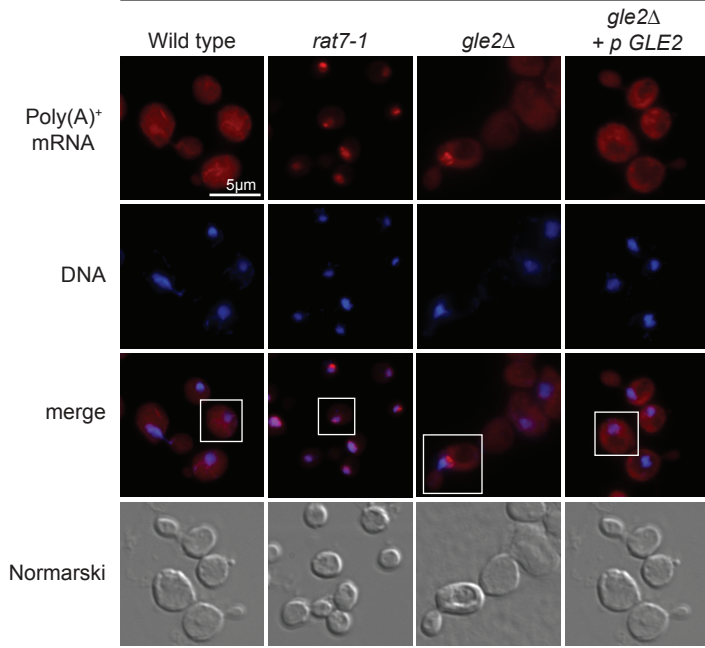

Supplement: YEA-34-459-s003.pdf [file YEA-34-459-s003.pdf]

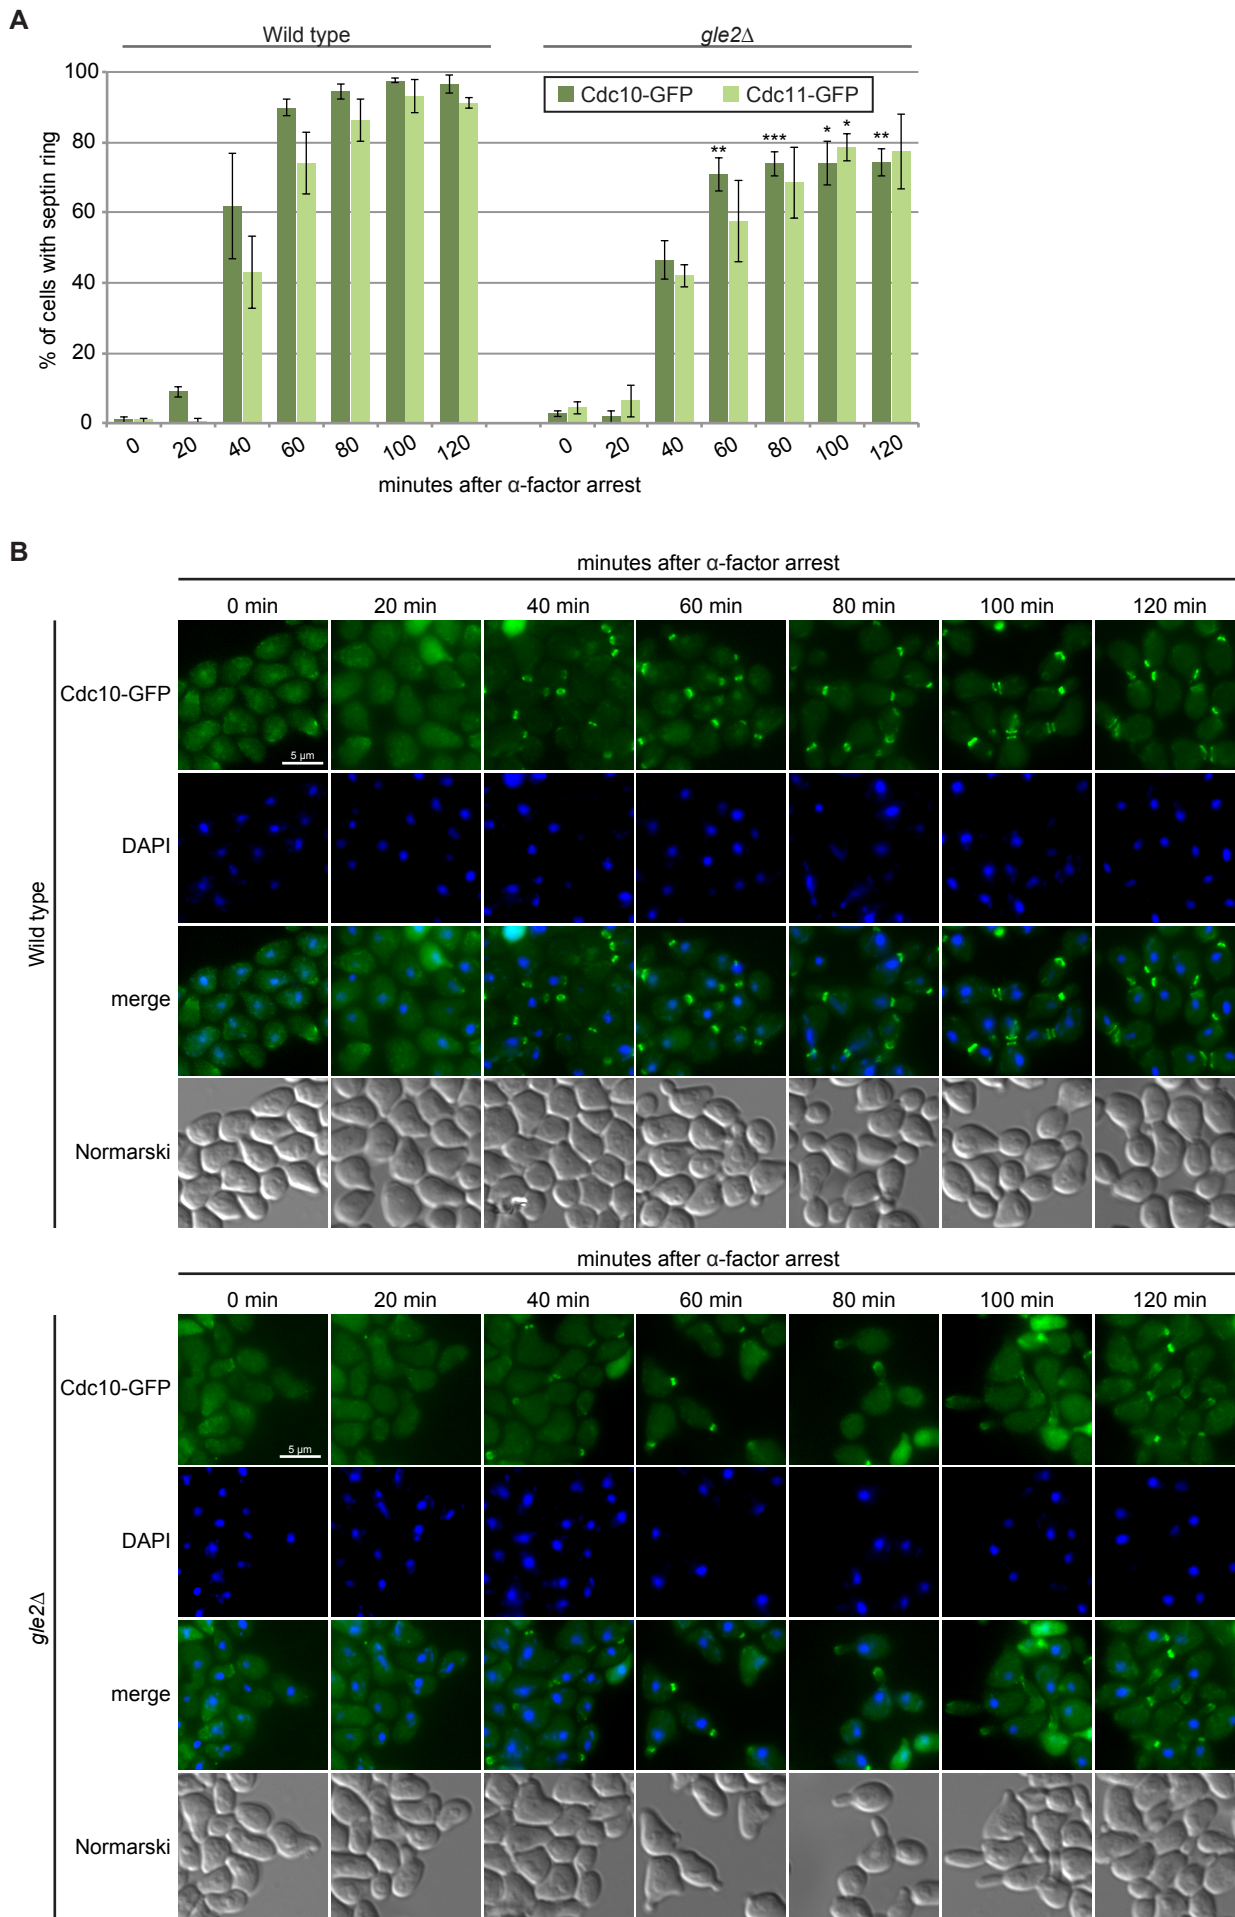

Supplement: YEA-34-459-s004.pdf [file YEA-34-459-s004.pdf]

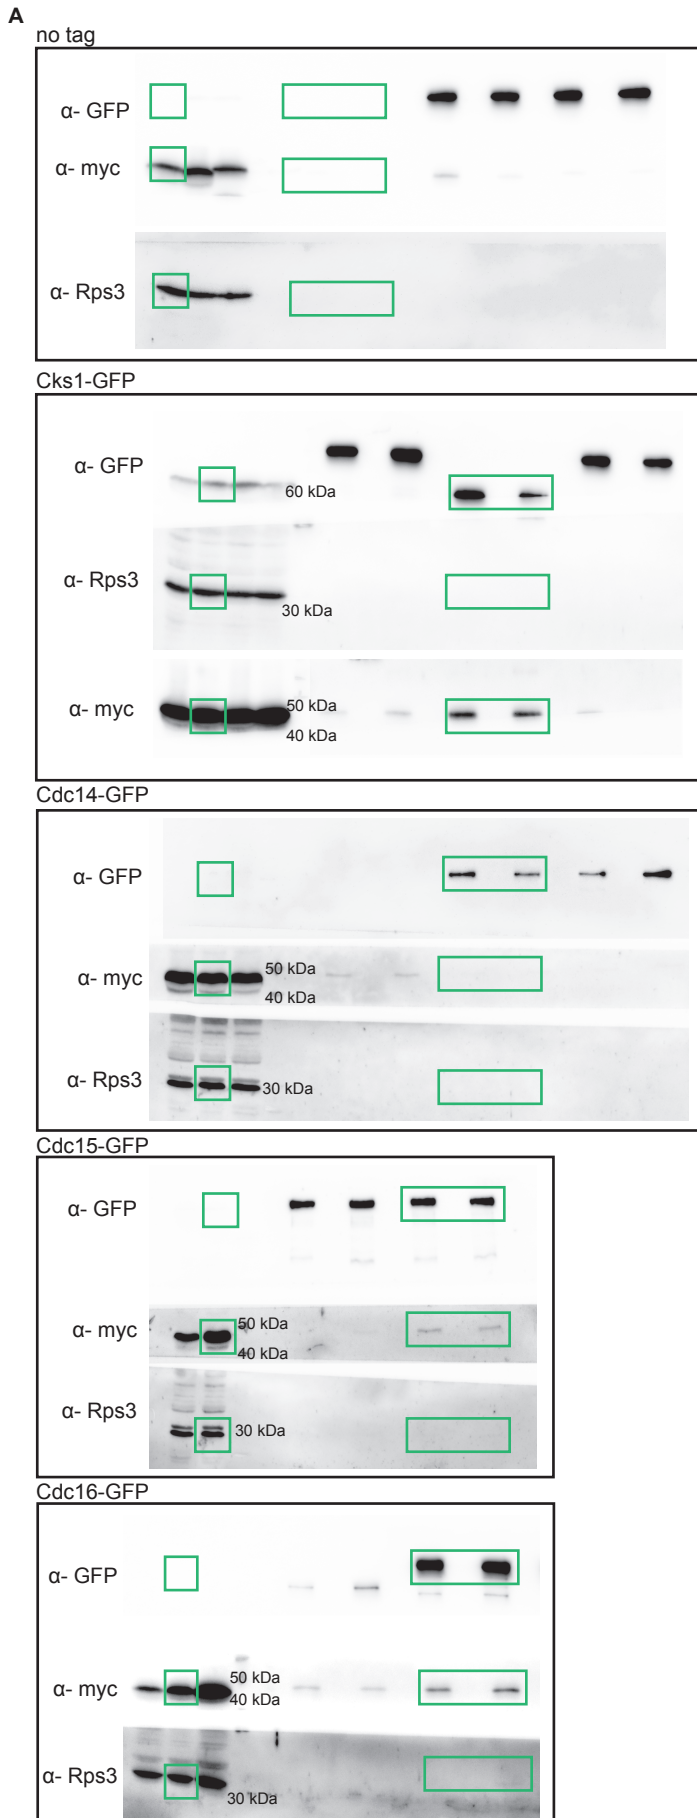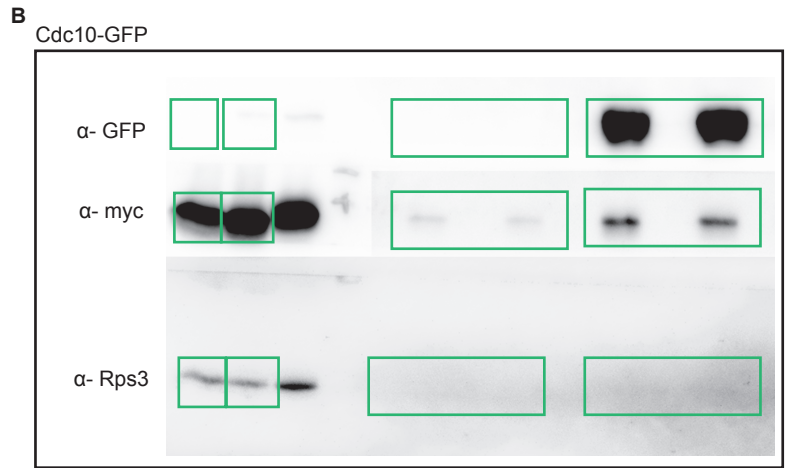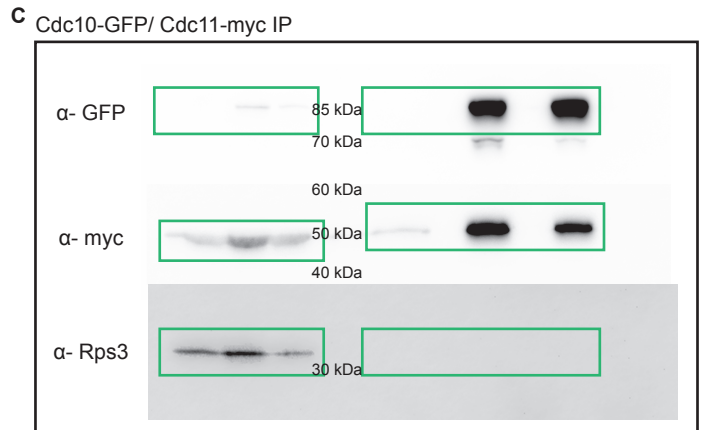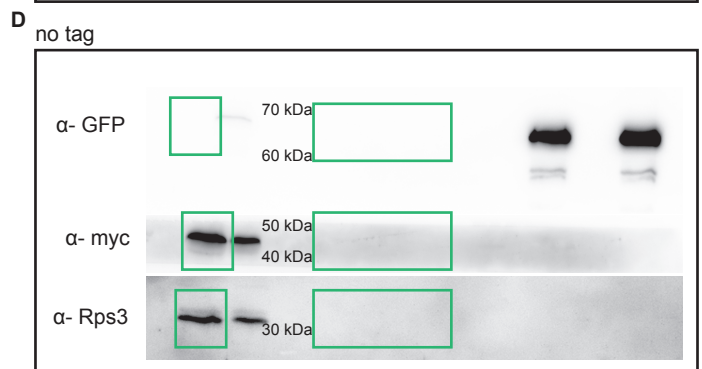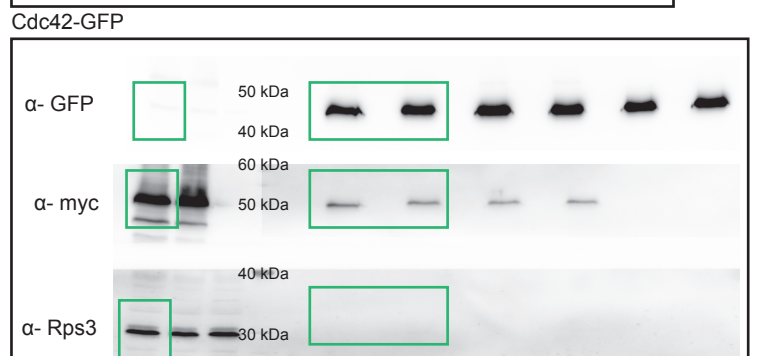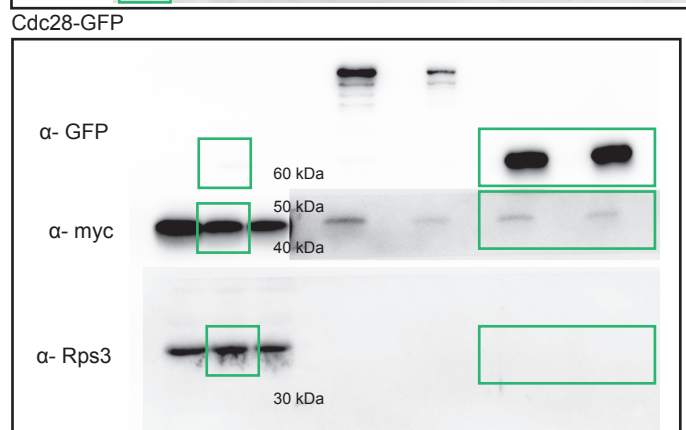

Supplement: YEA-34-459-s005.pdf [file YEA-34-459-s005.pdf]
